1 **COMPENSATION FOR CHRONIC OXIDATIVE STRESS IN ALADIN NULL MICE**

2

3 Ramona Jühlen<sup>1\*</sup>, Mirko Peitzsch<sup>2</sup>, Sebastian Gärtner<sup>3</sup>, Dana Landgraf<sup>1</sup>, Graeme Eisenhofer<sup>4</sup>,

4 Angela Huebner<sup>1</sup>, Katrin Koehler<sup>1</sup>

5

6 <sup>1</sup> Klinik und Poliklinik für Kinder- und Jugendmedizin, Universitätsklinikum Carl Gustav Carus,  
7 Technische Universität Dresden, Germany.

8 <sup>2</sup> Institut für Klinische Chemie und Laboratoriumsmedizin, Universitätsklinikum Carl Gustav  
9 Carus, Technische Universität Dresden, Germany.

10 <sup>3</sup> Helmholtz-Zentrum Dresden-Rossendorf, Institut für Radiopharmazeutische Krebsforschung,  
11 Dresden, Germany.

12 <sup>4</sup> Institut für Klinische Chemie und Laboratoriumsmedizin, Universitätsklinikum Carl Gustav  
13 Carus, Technische Universität Dresden; Medizinische Klinik und Poliklinik III,  
14 Universitätsklinikum Carl Gustav Carus, Technische Universität Dresden, Germany.

15

16 \*Corresponding author: [ramona.juehlen@uniklinikum-dresden.de](mailto:ramona.juehlen@uniklinikum-dresden.de)

17

18

19

20

21

22

23

24

25

26 ABSTRACT

27 **Background**

28 Mutations in the *AAAS* gene coding for the nuclear pore complex protein ALADIN lead to the  
29 autosomal recessive disorder triple A syndrome. Triple A patients present with a characteristic  
30 phenotype including alacrima, achalasia and adrenal insufficiency. Patient fibroblasts show  
31 increased levels of oxidative stress and several *in vitro* studies demonstrated that the nucleoporin  
32 ALADIN is involved in the cellular oxidative stress response and in adrenal steroidogenesis. We  
33 showed that ALADIN knock-out mice lack a phenotype resembling human triple A syndrome.  
34 Thus, we hypothesized that application of chronic oxidative stress by ingestion of paraquat will  
35 generate triple A-like phenotype in ALADIN null mice.

36 **Results**

37 We demonstrate that ALADIN knock-out mice present with an unexpected compensated glutathione  
38 metabolism still lacking a phenotype resembling human triple A syndrome after application of  
39 chronic oxidative stress. We could not observe increased levels of oxidative stress and alterations in  
40 adrenal steroidogenesis in mice depleted for ALADIN.

41 **Conclusions**

42 This study stresses the species-specific role of the nucleoporin ALADIN presenting a novel  
43 compensatory mechanism of the cellular glutathione redox response and shedding light on the role  
44 of ALADIN in the cell.

45

46

47 **KEYWORDS**

48 Adrenal steroidogenesis/ ALADIN/ Oxidative stress/ Paraquat/ Triple A syndrome

49

50

## 51 BACKGROUND

52 The triple A syndrome (OMIM #231550), a rare autosomal recessive disorder, is caused by  
53 homozygous or compound heterozygous mutations in the *AAAS* (**a**chalasia-**a**drenal insufficiency-  
54 **a**lacrima syndrome) gene encoding the nucleoporin ALADIN (**a**lacrima-**a**chalasia-**a**drenal  
55 **i**nsufficiency **n**eurologic disorder) [1,2]. Triple A patients present with the characteristic triad of  
56 adrenocorticotrophic hormone-resistant adrenal insufficiency, achalasia of the stomach cardia and  
57 alacrima in combination with progressive neurological impairments [3]. Phenotypic appearance of  
58 all symptoms is heterogeneous and highly variable. Adrenal atrophy may occur later in life and may  
59 develop gradually [4,5]. ALADIN is anchored within the nuclear pore complex by the  
60 transmembrane nucleoporin NDC1 (nuclear division cycle 1 homologue (*S. cerevisiae*)) [6,7].  
61 Rabut et al. suggested that ALADIN forms part of the structural backbone of the nuclear pore  
62 complex but is not needed itself for integrity of the complex [8].

63 In contrast to other organs with high metabolic rates the adrenal gland has high levels of  
64 enzymatic and non-enzymatic anti-oxidants [9]. Imbalances in reactive oxygen species (ROS) result  
65 in cellular oxidative stress and have been implicated in a variety of diseases [9]. Adrenocortical  
66 mitochondrial steroidogenesis significantly adds to ROS formation in the cell because uncoupling  
67 of the cytochrome P450 enzyme (CYP) redox reaction can occur in several steps of the reaction  
68 [10,11]. Under these circumstances superoxide anions and hydrogen peroxide can leak and escape  
69 from the redox reaction [10]. Therefore, an equilibrated level of anti-oxidative mechanisms is of  
70 high importance in adrenocortical cells.

71 A sound body of published work has reported that ALADIN is involved in the cellular  
72 oxidative stress response *in vitro* in adrenocortical and fibroblast cells but the role of ALADIN in  
73 adrenal steroidogenesis and how this might contribute to adrenal atrophy in triple A patients remains  
74 largely unknown [12–17]. We have shown that depletion of ALADIN in human adrenocortical  
75 carcinoma cells leads to an alteration in glucocorticoid and androgen steroidogenesis [13]. Recently,

76 we identified progesterone receptor membrane compartment 2 (PGRMC2) as a novel protein  
77 interactor of ALADIN [18]. Microsomal PGRMC2 itself seems to be involved in adrenal  
78 steroidogenesis either by regulating heme synthesis, the prosthetic group of microsomal CYPs, or  
79 by acting as an electron donor for several CYPs [19,20].

80 Here, we sought to verify the critical role for ALADIN in the cellular redox regulation in  
81 ALADIN null mice. Female homozygous mice deficient for *Aaas* are sterile/infertile but otherwise  
82 ALADIN null mice present with a mild phenotype [21]. Carvalhal et al. postulated that female  
83 sterility in ALADIN-deficient mice is caused by impaired chromosomal segregation and maturation  
84 of oocytes [22]. Most recently, it was shown that conditional ablation of ALADIN interactor  
85 PGRMC2 from the female reproductive tract results in reproductive senescence [23].

86 We hypothesized that application of oxidative stress using paraquat in mice deficient for  
87 ALADIN will generate symptoms seen in triple A patients which the animals lack under basal  
88 conditions. In order to increase the sensitivity for oxidative stress we used, besides our *Aaas* knock-  
89 out (KO) mice, offspring from intercrossed heterozygous (Het) *Sod2* female mice and *Aaas* KO  
90 male mice to obtain *Aaas* KO/*Sod2* Het mice.

91

92

## 93 MATERIALS AND METHODS

### 94 • Experimental animals and treatments

95 All mice were housed in the animal care facility (Experimental Center) of the Technical University  
96 Dresden, Dresden, Germany. All procedures were approved by the Regional Board for Veterinarian  
97 Affairs, Dresden, Germany (AZ 24-9168.11-1/-2010-49) in accordance with the institutional  
98 guidelines for the care and use of laboratory animals. Animals were group housed except during  
99 actual experimental procedures, when single housing was required. Mice were kept under specific-  
100 pathogen-free conditions at a constant temperature ( $22 \pm 1$  °C) and a 12 hours light-dark cycle at all

101 times. Mice were weaned onto ssniff R/M-H (19% protein, 4.9% fibers, 3.3% fat, 12.2 MJ/kg).  
102 (ssniff GmbH, Soest, Germany) if not stated otherwise and drank water ad libitum. *Aaas*-deficient  
103 mice were generated as described previously [21] and backcrossed to strain C75BL/6J for ten  
104 generations. A heterozygous *Sod2* mouse strain was obtained from The Jackson Laboratory, Bar  
105 Harbor, ME USA (Strain #002973 B6.129S7-*Sod2*<sup>tm1Leb</sup>/J). Heterozygous *Sod2* female mice were  
106 intercrossed for two generations with *Aaas* KO male mice to obtain *Aaas* KO/*Sod2* Het mice.

107 For chronic oxidative stress exposure one-year-old adult male mice of three different  
108 genotypes [wild-type (WT) (n=16), *Aaas* KO (n=16) and *Aaas* KO/*Sod2* Het (n=10)] were used and  
109 randomly divided into two groups (stress and control group). All were placed on a commercial diet  
110 (ssniff R/M-H) for 3 days to allow acclimation to these conditions. Mice were then fed with  
111 paraquat diet (0.25 g/kg diet) (ssniff GmbH) in the stress group and with control diet (ssniff GmbH)  
112 for 11 days. Body weight and diet weight were determined every day during the feeding period. At  
113 the end (day 11) of the feeding period animals were sacrificed. Lung and liver were surgically  
114 removed, washed in ice-cold PBS and weighed. Different parts of the liver were prepared for  
115 glutathione measurement and assessment of lipid peroxidation. Adrenals and liver sections were  
116 surgically excised and quickly frozen in liquid nitrogen and stored at -80 °C before RNA extraction.

117

118 • Hepatic glutathione assay

119 Small samples (40-100 mg) of liver tissue were rapidly cut on an ice-cold petri dish ensuring to  
120 prevent oxidation of reduced glutathione (GSH) to oxidized glutathione (GSSG) during preparation.  
121 Each small sample was immediately placed with a forceps in liquid nitrogen. Samples in the tubes  
122 were re-weighed and the weight of the tissue was determined. Ten volumes of ice-cold 5%  
123 sulfosalicylic acid (Carl Roth, Karlsruhe, Germany) were added to each tube, the sample was  
124 transferred to a tissue grinder and homogenized until evenly suspended. The suspension was added  
125 to the same tube and centrifuged at 4 °C at 14000x g for 10 minutes. The supernatant was

126 transferred to a new tube and equal volume of ice-cold 500 mM HEPES (pH 8) (Gibco, Thermo  
127 Fisher Scientific, Schwerte, Germany) were added.

128 Each sample was diluted 60-fold in ice-cold 250 mM HEPES (pH 7.5) to be in linear  
129 detection range for measurement of total and oxidized glutathione using the GSH/GSSG-Glo assay  
130 (Promega, Mannheim, Germany). Measurements were done in duplicate as outlined in the protocol  
131 of the manufacturer and as reported elsewhere [13].

132

133 • Hepatic lipid peroxidation measurement

134 End-products of hepatic lipid peroxidation, malondialdehyde precursors and other thiobarbituric  
135 acid reactive substances (TBARS), were extracted from liver sections as described before by  
136 centrifugation at 1600x g for 10 minutes [24]. TBARS were quantified in triplicate  
137 spectrophotometrically at 535 and 520 nm as outlined previously [24] on a 96-well culture dish  
138 (200 µl/well) (Corning Costar, Kaiserslautern, Germany) using a Infinite 200 PRO Microplate  
139 Reader with the Magellan Data Analysis Software v6.6 (Tecan Group AG, Männedorf, Switzerland).

140

141 • RNA extraction, cDNA synthesis and quantitative real-time PCR using TaqMan

142 Total RNA from frozen murine liver and adrenals was isolated, purity assessed, reverse transcribed  
143 and qPCR amplifications in 20 µl total volumes performed as outlined elsewhere [18].

144 As reference gene for normalization beta-actin was evaluated and used. Positive controls  
145 contained a random mix of cDNA and negative controls contained nuclease-free water instead of  
146 cDNA. In all real-time qPCR experiments relative gene expression was calculated by the  $C_t$  method  
147 using standard and semi-log plots of amplification curves. In all results repeatability was assessed  
148 by standard deviation of triplicate  $C_t$ s and reproducibility was verified by normalizing all real-time  
149 RT-PCR experiments by the  $C_t$  of each positive control per run.

150 Primers for the amplification of the target sequence of beta actin (*Actb*), *Cyp11a1*, *Cyp11b1*,

151 *Cyp11b2*, *Cyp21a1*, glutathione peroxidase 1 (*Gpx1*), glutathione reductase (*Gsr*), heme oxygenase  
152 1 (*Hmox1*), hydroxy-delta-5-steroid dehydrogenase (*Hsd3b2*), nicotinamide nucleotide  
153 transhydrogenase (*Nnt*), superoxide dismutase 2 (*Sod2*) and steroidogenic acute regulatory protein  
154 (*Star*) were designed using Primer Express 3.0 (Applied Biosystems, Life Technologies, Darmstadt,  
155 Germany) and compared to the murine genome database for unique binding using BLAST search  
156 (<https://blast.ncbi.nlm.nih.gov/Blast.cgi>). The primer sequences and gene accession numbers are  
157 listed in **Table S1**.

158 The guidelines of the Minimum Information for Publication of Quantitative Real-Time PCR  
159 Experiments were followed in this study to allow more reliable interpretation of real-time RT-PCR  
160 results [25].

161

162 • LC-MS/MS measurement of steroids

163 Blood for plasma steroid measurement by liquid chromatography tandem mass spectrometry  
164 (LC/MS-MS) was collected by cardiac puncture. Plasma steroids pregnenolone (Preg), progesterone  
165 (P), 17-hydroxyprogesterone (17OHP), deoxycorticosterone (DOC), corticosterone (B), aldosterone  
166 (ALDO), androstenedione (AE), dehydroepiandrosterone (DHEA) and dehydroepiandrosterone  
167 sulfate (DHEAS) were determined simultaneously by LC-MS/MS as reported previously [26].  
168 Quantification of steroid levels was done by comparisons of ratios of analyte peak area obtained  
169 from plasma samples to the respective peak area of stable isotope labelled internal standard  
170 calibrators.

171

172 • Histology

173 Sections of brain, duodenum, liver and lung were washed in PBS and fixed in 4% formaldehyde  
174 (SAV LP, Flinsbach, Germany) for 24 hrs. Organs were then transferred to PBS and prepared for  
175 histology at the Histology Facility of the Joint Technology Platform (Technische Universität

176 Dresden, Biotec, CRTD).

177 Tissues were embedded into paraffin with the Microm STP 420 D dehydration/infiltration  
178 unit (Thermo Fisher Scientific, Waltham, Massachusetts, USA) and the EGF 1160 embedding  
179 station (Leica, Wetzlar, Germany). This included stepwise dehydration in a graded alcohol series,  
180 transfer to xylol, as well as paraffin infiltration and sample orientation. Paraffin-embedded samples  
181 were sectioned using a Microm HM 340E (Thermo Fisher Scientific) and stained with hematoxylin-  
182 eosin (Carl Roth).

183

184 • Statistical analysis

185 Statistical analyses were made using the open-source software R version 3.3.2 and R Studio version  
186 1.0.136 (R Core Team, 2016). Unpaired Wilcoxon–Mann–Whitney U-test was performed. During  
187 evaluation of the results a confidence interval alpha of 95% and P-values lower than 0.05 were  
188 considered as statistically significant.

189

190

## 191 RESULTS

192 • Chronic oxidative stress is not detected by increased *Hmox1* expression

193 Assessment of the level of oxidative stress was done by measuring adrenal *Hmox1* gene expression  
194 by qPCR. *Hmox1* is a widely-used redox-regulated gene whose transcriptional activation is  
195 dependent on upstream transcriptional regulators which are induced by a broad spectrum of  
196 conditions involving oxidative stress, nitrosative stress, thiol-reactive substances and cytokines  
197 [27]. We could not see an increased expression of *Hmox1* in animals under paraquat diet compared  
198 to control diet (**Fig. 1A**). However, under control diet the expression was significantly decreased in  
199 *Aaas* KO/*Sod2* Het compared to *Aaas* KO animals.

200 Hepatic and adrenal *Sod2* expression was about two-fold diminished in *Aaas* KO/*Sod2* Het



201 mice under control or paraquat diet compared to WT and *Aaas* KO mice of the same diet (**Fig. 1B**).

202

203 • Adrenal steroid output is not affected by chronic oxidative stress exposure

204 The expression of *Star* was increased in *Aaas* KO versus WT animals after paraquat diet (**Fig. 2A**).

205 Furthermore, *Aaas* KO/*Sod2* Het mice under paraquat diet presented with decreased expression of

206 *Star* compared to *Aaas* KO mice of the same diet but neither expression levels of *Cyp21a1*,

207 *Cyp11a1*, *Cyp11b1*, *Cyp11b2*, and *Hsd3b2* were changed nor could we see a specific effect

208 depending on genotype of the mice (**Fig. S1A-E**).

209 Plasma levels of Preg, P, DOC, B, ALDO and DHEAS were not significantly altered upon

210 paraquat diet or in between the different genotypes (**Fig. S2A-F**). Plasma levels of 17OHP and

211 DHEA were under detection threshold. Production of AE which in mice is only synthesized in

212 gonads was about five-fold increased in WT animals after ingestion of paraquat compared to WT

213 animals of the control diet (**Fig. 2B**). Furthermore, AE levels in *Aaas* KO versus WT animals were

214 about 25-fold decreased after paraquat diet (**Fig. 2B**).

215

216 • Paraquat diet and ALADIN depletion decrease body weight gain

217 In the control diet food intake over 11 days of experimental procedure was significantly decreased

218 in *Aaas* KO/*Sod2* Het mice compared to WT mice (**Fig. 3A**). We also saw a lowered food intake in

219 *Aaas* KO animals but it appeared not to be significant. Weight gain in *Aaas* KO and *Aaas* KO/*Sod2*

220 Het mice was about two-fold diminished in the control diet compared to the WT (**Fig. 3B**).

221 WT mice on the paraquat diet fed less compared to the control diet; however, food intake in

222 *Aaas* KO/*Sod2* Het mice was higher versus the WT (**Fig. 3A**). Accordingly, WT animals gained

223 about 20-fold less weight compared to the control diet and weight gain was also about four-fold

224 lowered in *Aaas* KO and *Aaas* KO/*Sod2* Het animals versus the control diet despite increased food

225 intake (**Fig. 3A-B**).

226

227 • Hepatic glutathione levels are balanced in ALADIN null mice

228 Hepatic GSH/GSSG ratios in *Aaas* KO/*Sod2* Het animals either under control or paraquat diet were  
229 about five-fold increased compared to WT animals under the same diet (**Fig. 4A**). Additionally,  
230 paraquat diet increased the ratio significantly in *Aaas* KO/*Sod2* Het animals compared to the same  
231 genotype under control diet. GSH/GSSG ratios of *Aaas* KO mice rather presented like WT mice.

232 GSH concentrations were higher in *Aaas* KO/*Sod2* Het livers either under control or  
233 paraquat diet versus WT and *Aaas* KO mice under the same diet (**Fig. 4B**). Hepatic GSH content in  
234 *Aaas* KO mice were comparable to WT mice.

235 Similarly, hepatic GSSG concentrations were about two-fold diminished in *Aaas* KO/*Sod2*  
236 Het animals compared to WT and *Aaas* KO animals under the same diet (**Fig. 4C**). Furthermore,  
237 GSSG concentrations decreased in *Aaas* KO/*Sod2* Het mice when under paraquat diet. Interestingly,  
238 GSSG content in *Aaas* KO mice under control diet was significantly higher compared to WT and  
239 *Aaas* KO/*Sod2* Het mice. This effect was reversed under paraquat diet: GSSG concentration in *Aaas*  
240 KO animals decreased compared to control diet.

241 We could see no alteration in the expression of *Gpx1* in control or paraquat diet animals or in  
242 the different genotypes (**Fig. S3A**). However, *Aaas* KO/*Sod2* Het mice under paraquat diet  
243 presented with decreased expression of *Gsr* compared to *Aaas* KO mice (**Fig. S3B**). Most strikingly,  
244 hepatic and adrenal expression of *Nnt* was about two-fold increased in *Aaas* KO and *Aaas* KO/*Sod2*  
245 Het mice under control diet versus the WT (**Fig. 4D**). Under paraquat diet hepatic *Nnt* expression  
246 was still higher in *Aaas* KO animals compared to WT animals and adrenal *Nnt* expression was  
247 significantly increased in *Aaas* KO/*Sod2* Het mice under paraquat diet.

248 Relative liver and lung weights and hepatic TBARS values were not altered upon oxidative  
249 stress exposure using a paraquat diet or in the different genotypes (**Figs. S4 and S5**). No  
250 pathological differences in histology sections of brain, duodenum, liver and lung could be found

251 (data not shown).

252

253

## 254 DISCUSSION

255 In the present study we investigated the role of the nucleoporin ALADIN in chronic paraquat-  
256 induced oxidative stress in male mice. ALADIN-deficient mice lack a triple A syndrome-  
257 characteristic phenotype [21]. Previous studies have demonstrated that ALADIN employs a crucial  
258 role in the redox response of the cell *in vitro* [12–17]. Triple A patients as well suffer from increased  
259 cellular oxidative stress as preliminary shown by Fragoso et al. [28]. Thus, we hypothesized that  
260 chronic oxidative stress will unmask the distinct phenotype in ALADIN null mice.

261 Overall, after chronic oxidative stress exposure we did not see a triple A syndrome-  
262 characteristic phenotype in mice depleted for ALADIN. Previous to our study a pilot experiment  
263 using acute oxidative stress by injection with paraquat i.p. (25 mg/kg body weight) in mice was  
264 performed but no involvement of ALADIN in the acute oxidative stress response was obtained (data  
265 not shown). Our murine *in vivo* result in this study is contrary to various human *in vitro* cell systems  
266 in which upon depletion of ALADIN a disturbed redox homeostasis and altered adrenal  
267 steroidogenesis were seen [12–14]. We assume that this discrepancy is either a result of the species-  
268 specific role of ALADIN or of the experimental nature of the study comparing *in vitro* with *in vivo*  
269 models.

270 In more detail, our data indicate that on the one hand, mice depleted for ALADIN during  
271 basal conditions and after chronic oxidative stress exposure sustain with balanced hepatic  
272 glutathione levels by up-regulation of *Nnt* resulting in a WT-like phenotype. On the other hand,  
273 *Aaas* KO/*Sod2* Het mice under basal conditions increase hepatic glutathione levels by increasing  
274 *Nnt* expression. This effect was intensified after chronic oxidative stress exposure. In the cell  
275 transmembrane nicotinamide nucleotide transhydrogenase (NNT) plays a key role in the

276 mitochondrial defense system against reactive oxygen species (ROS) by producing NADPH (Fig.  
277 5). NADPH is in turn consumed by glutathione reductase (GSR) maintaining reduced glutathione  
278 (GSH) levels from oxidized glutathione (GSSG) [29]. ROS, i.e. superoxide anions, leaking during  
279 mitochondrial aerobic respiration or produced by exogenous stressors are converted to hydrogen  
280 peroxide by mitochondrial superoxide dismutase (SOD2). Hydrogen peroxide is then neutralized to  
281 water-consuming GSH by several peroxidases (GPX).

282 It has already been shown that heterozygous deficiency for *Sod2* in mice activates  
283 mitochondrial uncoupling to reduce ROS production and increases aerobic glycolysis by a free  
284 radical-mediated mechanism [30]. Mice heterozygous deficient for *Sod2* exhibit increased levels of  
285 ROS and shift from mitochondrial oxidative phosphorylation to a cytosolic glycolytic pathway [30].  
286 During aerobic glycolysis a high rate of energy is produced by metabolizing glucose into pyruvate  
287 which then feeds into cytosolic lactic acid fermentation rather than mitochondrial oxidation,  
288 commonly known as the Warburg Effect [30,31]. In the present study it can thus be assumed that  
289 the phenotypic effects seen in *Aaas* KO/*Sod2* Het mice are caused by both the Warburg Effect and  
290 increased expression of *Nnt*. This additive effect in turn leads to transient increase of glutathione  
291 oxidative capacity and to an enhancement of the compensatory effect seen in *Aaas* KO mice which  
292 lack typical symptoms of triple A syndrome. Thus, we present that ALADIN plays a crucial role in  
293 regulating NADPH levels in the cell and concomitantly enhances oxidative capacity of glutathione  
294 by altered gene expression of NNT. Gene down-regulation of *Nnt* has been associated with age-  
295 related neurodegeneration in Alzheimer disease-like mouse neurons [32]. It has been reported that  
296 NAD(P)H redox control is more critical than GSH content in promoting neurodegeneration [32].  
297 This result partly explains why mice depleted for ALADIN do not present with a triple A syndrome-  
298 distinct phenotype but rather behave like WT animals. In view of its cellular localization at the  
299 nuclear pore we hypothesize that ALADIN plays a role in regulating the export of *Nnt* mRNA  
300 through the nuclear pore complex and thus, in balancing levels of NADPH.

301 We based our study of chronic paraquat-induced oxidative stress on the work of Aoki and  
302 colleagues in which a 0.025% paraquat enriched diet was also used to induce oxidative stress in  
303 four-week-old juvenile male rats [33]. In contrast to our results Aoki et al. found that by feeding rats  
304 the paraquat diet animals suffered from elevated hepatic lipid (TBARS) and glutathione (GSSG)  
305 oxidation, liver organ shrinkage and lung enlargement [33]. We could not reproduce these results in  
306 our mice. This may be due to the different age of the animals or to different anti-oxidant defenses in  
307 the two rodent species. Results from Aoki et al. regarding food intake and body weight gain were  
308 consistent to our study [33]. Here, we show that depletion of ALADIN in mice negatively affected  
309 body weight gain under normal control and paraquat diet. This result is underlined by increased  
310 food intake under paraquat diet in these animals.

311

312

### 313 CONCLUSIONS

314 Our *in vivo* study is the first to highlight a species-specific role of the nucleoporin ALADIN.  
315 Our study implies a complex cellular system involved to compensate a depletion of ALADIN which  
316 seems to have an important task in balancing NADPH levels in the cell. Future research shall  
317 address which other and how these pathways are involved in a possible compensating mechanism  
318 clarifying the role of ALADIN in the pathogenesis in triple A syndrome.

319

320

### 321 REFERENCES

1. Handschug K, Sperling S, Yoon SJ, Hennig S, Clark AJ, Huebner A. Triple A syndrome is caused by mutations in AAAS, a new WD-repeat protein gene. *Hum. Mol. Genet.* 2001;10:283–90.
2. Tullio-Pelet A, Salomon R, Hadj-Rabia S, Mugnier C, de Laet MH, Chaouachi B, et al. Mutant WD-repeat protein in triple-A syndrome. *Nat. Genet.* 2000;26:332–5.

3. Allgrove J, Clayden GS, Grant DB, Macaulay JC. Familial glucocorticoid deficiency with achalasia of the cardia and deficient tear production. *Lancet*. 1978;1:1284–6.
4. Huebner A, Kaindl AM, Braun R, Handschug K. New insights into the molecular basis of the triple A syndrome. *Endocr. Res*. 2002;28:733–9.
5. Milenkovic T, Zdravkovic D, Savic N, Todorovic S, Mitrovic K, Koehler K, et al. Triple A syndrome: 32 years experience of a single centre (1977-2008). *Eur. J. Pediatr*. 2010;169:1323–8.
6. Kind B, Koehler K, Lorenz M, Huebner A. The nuclear pore complex protein ALADIN is anchored via NDC1 but not via POM121 and GP210 in the nuclear envelope. *Biochem. Biophys. Res. Commun*. 2009;390:205–10.
7. Yamazumi Y, Kamiya A, Nishida A, Nishihara A, Iemura S, Natsume T, et al. The transmembrane nucleoporin NDC1 is required for targeting of ALADIN to nuclear pore complexes. *Biochem. Biophys. Res. Commun*. 2009;389:100–4.
8. Rabut G, Doye V, Ellenberg J. Mapping the dynamic organization of the nuclear pore complex inside single living cells. *Nat. Cell Biol*. 2004;6:1114–21.
9. Prasad R, Kowalczyk JC, Meimaridou E, Storr HL, Metherell LA. Oxidative stress and adrenocortical insufficiency. *J. Endocrinol*. 2014;221:R63-73.
10. Dekant W. The role of biotransformation and bioactivation in toxicity. In: Lurch A, editor. *Mol. Clin. Environ. Toxicol. Vol. 1 Mol. Toxicol*. Birkhäuser Basel; 2009. p. 57–86.
11. Rapoport R, Sklan D, Hanukoglu I. Electron leakage from the adrenal cortex mitochondrial P450<sub>scc</sub> and P450<sub>c11</sub> systems: NADPH and steroid dependence. *Arch. Biochem. Biophys*. 1995;317:412–6.
12. Kind B, Koehler K, Krumbholz M, Landgraf D, Huebner A. Intracellular ROS level is increased in fibroblasts of triple A syndrome patients. *J. Mol. Med*. 2010;88:1233–42.
13. Jühlen R, Idkowiak J, Taylor AE, Kind B, Arlt W, Huebner A, et al. Role of ALADIN in Human Adrenocortical Cells for Oxidative Stress Response and Steroidogenesis. *PLoS One*. 2015;10:e0124582.
14. Prasad R, Metherell LA, Clark AJ, Storr HL. Deficiency of ALADIN impairs redox homeostasis in human adrenal cells and inhibits steroidogenesis. *Endocrinology*. 2013;154:3209–18.

15. Storr HL, Kind B, Parfitt DA, Chappell JP, Lorenz M, Koehler K, et al. Deficiency of ferritin heavy-chain nuclear import in triple a syndrome implies nuclear oxidative damage as the primary disease mechanism. *Mol. Endocrinol. Baltim. Md.* 2009;23:2086–94.
16. Hirano M, Furiya Y, Asai H, Yasui A, Ueno S. ALADINI482S causes selective failure of nuclear protein import and hypersensitivity to oxidative stress in triple A syndrome. *Proc. Natl. Acad. Sci. U. S. A.* 2006;103:2298–303.
17. Koehler K, End K, Kind B, Landgraf D, Mitzscherling P, Huebner A. Changes in differential gene expression in fibroblast cells from patients with triple A syndrome under oxidative stress. *Horm. Metab. Res.* 2013;45:102–8.
18. Jühlen R, Landgraf D, Huebner A, Koehler K. Identification of a novel putative interaction partner of the nucleoporin ALADIN. *Biol. Open.* 2016;5:1697–705.
19. Piel RB, Shiferaw MT, Vashisht AA, Marcero JR, Praissman JL, Phillips JD, et al. A Novel Role for Progesterone Receptor Membrane Component 1 (PGRMC1): A Partner and Regulator of Ferrochelatase. *Biochemistry (Mosc.)*. 2016;
20. Wendler A, Wehling M. PGRMC2, a yet uncharacterized protein with potential as tumor suppressor, migration inhibitor, and regulator of cytochrome P450 enzyme activity. *Steroids.* 2013;78:555–8.
21. Huebner A, Mann P, Rohde E, Kaindl AM, Witt M, Verkade P, et al. Mice lacking the nuclear pore complex protein ALADIN show female infertility but fail to develop a phenotype resembling human triple A syndrome. *Mol. Cell. Biol.* 2006;26:1879–87.
22. Carvalhal S, Stevense M, Koehler K, Naumann R, Huebner A, Jessberger R, et al. ALADIN is Required for the Production of Fertile Mouse Oocytes. *bioRxiv.* 2016;043307.
23. Clark N, Pru C, Yee S, Lydon J, Peluso J, Pru J. Conditional Ablation of Progesterone Receptor Membrane Component 2 Causes Female Premature Reproductive Senescence. *Endocrinology.* 2016;en.2016-1701.
24. Mihara M, Uchiyama M. Determination of malonaldehyde precursor in tissues by thiobarbituric acid test. *Anal. Biochem.* 1978;86:271–8.
25. Bustin SA, Benes V, Garson J, Hellems J, Huggett J, Kubista M, et al. The need for transparency and good practices in the qPCR literature. *Nat. Methods.* 2013;10:1063–7.
26. Peitzsch M, Dekkers T, Haase M, Sweep FCGJ, Quack I, Antoch G, et al. An LC-MS/MS method for steroid

profiling during adrenal venous sampling for investigation of primary aldosteronism. *J. Steroid Biochem. Mol. Biol.* 2015;145:75–84.

27. Ryter SW, Choi AMK. Heme oxygenase-1: redox regulation of a stress protein in lung and cell culture models. *Antioxid. Redox Signal.* 2005;7:80–91.

28. Frago MCBV, Albuquerque EV de A, Cardoso AL de A, da Rosa PWL, de Paulo RB, Schimizu MHM, et al. Triple A Syndrome: Preliminary Response to the Antioxidant N-Acetylcysteine Treatment in a Child. *Horm. Res. Paediatr.* [Internet]. 2017 [cited 2017 Jun 26]; Available from: <http://www.karger.com/Article/Abstract/465520>

29. Kregel U, Törnroth-Horsefield S. Biochemistry. Coping with oxidative stress. *Science.* 2015;347:125–6.

30. Xu Y, Miriyala S, Fang F, Bakthavatchalu V, Noel T, Schell DM, et al. Manganese superoxide dismutase deficiency triggers mitochondrial uncoupling and the Warburg effect. *Oncogene.* 2015;34:4229–37.

31. Vander Heiden MG, Cantley LC, Thompson CB. Understanding the Warburg Effect: The Metabolic Requirements of Cell Proliferation. *Science.* 2009;324:1029–33.

32. Ghosh D, Levault KR, Brewer GJ. Relative importance of redox buffers GSH and NAD(P)H in age-related neurodegeneration and Alzheimer disease-like mouse neurons. *Aging Cell.* 2014;13:631–40.

33. Aoki H, Otaka Y, Igarashi K, Takenaka A. Soy protein reduces paraquat-induced oxidative stress in rats. *J. Nutr.* 2002;132:2258–62.

## DECLARATIONS

### 322 **Availability of data and material**

323 The datasets analyzed during the current study are available from the corresponding author on  
324 reasonable request. All data generated or analyzed during this study are included in this published  
325 article and its supplementary information files.

326

### 327 **Competing interests**



328 The authors declare that they have no competing interests.

329

### 330 **Funding**

331 This work was supported by Deutsche Forschungsgemeinschaft (grant HU 895/5-1/2) (Clinical  
332 Research Unit 252) to AH. The funders had no role in study design, data collection and analysis,  
333 decision to publish, or preparation of the manuscript.

334

### 335 **Author's contributions**

336 RJ, SG, AH and KK conceived and designed the experiments. RJ, MP, SG, DL and KK performed  
337 all experiments. RJ, MP, KK and AH analyzed the data. RJ wrote the paper. MP, SG, GE, AH and  
338 KK assisted with improving the manuscript. All authors read the final version of the manuscript and  
339 gave their permission for publication.

340

### **Acknowledgements**

We thank Michael Haase for analyzing murine histology sections.

341 FIGURE TITLES

342 **Figure 1. Expression analysis of (A) redox-regulated adrenal *Hmox1* and (B) adrenal and**  
343 **hepatic *Sod2*.** Mice were fed with paraquat diet (0.25 g/kg diet) and with control diet for 11 days.  
344 P-values: \* P<0.05, \*\* P<0.01. Significant differences were measured with unpaired Wilcoxon–  
345 Mann–Whitney U-test. Boxplot widths are proportional to the square root of the samples sizes.  
346 Whiskers indicate the range outside 1.5 times the inter-quartile range above the upper and below the  
347 lower quartile. Outliers were plotted as dots.

348

349 **Figure 2. Oxidative stress affects (A) expression of *Star* and (B) testicular synthesis**  
350 **androstenedione.** Mice were fed with paraquat diet (0.25 g/kg diet) in the stress group and with  
351 control diet for 11 days. P-values: \* P<0.05. Significant differences were measured with unpaired  
352 Wilcoxon–Mann–Whitney U-test. Boxplot widths are proportional to the square root of the samples  
353 sizes. Whiskers indicate the range outside 1.5 times the inter-quartile range above the upper and  
354 below the lower quartile. Outliers were plotted as dots.

355

356 **Figure 3. Alteration of (A) food intake and (B) body weight gain by oxidative stress.** Mice were  
357 fed with paraquat diet (0.25 g/kg diet) in the stress group and with control diet for 11 days. Body  
358 and diet weight were determined every day during the feeding period. P-values: (between different  
359 genotypes in one diet) \* P<0.05, \*\* P<0.01 and (between different diets in one genotype) ##  
360 P<0.01, ### P<0.001. Significant differences were measured with unpaired Wilcoxon–Mann–  
361 Whitney U-test. Boxplot widths are proportional to the square root of the samples sizes. Whiskers  
362 indicate the range outside 1.5 times the inter-quartile range above the upper and below the lower  
363 quartile. Outliers were plotted as dots.

364

365 **Figure 4. Balance of hepatic glutathione levels in ALADIN null mice.** Mice were fed with  
366 paraquat diet (0.25 g/kg diet) in the stress group and with control diet for 11 days. GSH, reduced  
367 glutathione. GSSG, oxidized glutathione. P-values: (between different genotypes in one diet) \*  
368 P<0.05, \*\* P<0.01 and (between different diets in one genotype) # P<0.05, ## P<0.01. Significant  
369 differences were measured with unpaired Wilcoxon–Mann–Whitney U-test. Boxplot widths are  
370 proportional to the square root of the samples sizes. Whiskers indicate the range outside 1.5 times  
371 the inter-quartile range above the upper and below the lower quartile. Outliers were plotted as dots.

372

373 **Figure 5. Mitochondrial redox defense system.** Transmembrane nicotinamide nucleotide

374 transhydrogenase (NNT) contributes to the mitochondrial redox defense system by producing  
375 NADPH. NADPH is consumed by glutathione reductase (GSR) maintaining reduced glutathione  
376 (GSH) levels from oxidized glutathione (GSSG). Electrons leaking during mitochondrial aerobic  
377 respiration result in superoxide anion radicals ( $O_2^{\cdot-}$ ) and are converted to hydrogen peroxide ( $H_2O_2$ )  
378 by mitochondrial superoxide dismutase (SOD2). Hydrogen peroxide is neutralized to water ( $H_2O$ )  
379 consuming GSH by glutathione peroxidase (GPX).

**A****TaqMan Hmox1**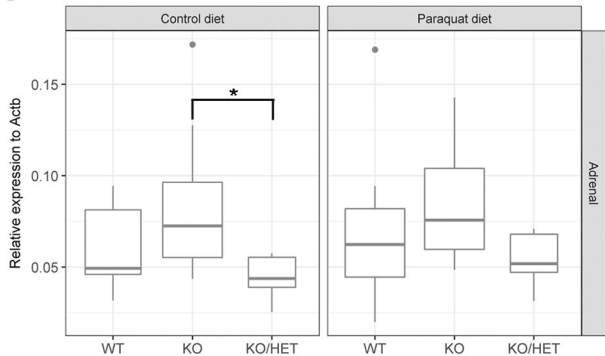**B****TaqMan Sod2**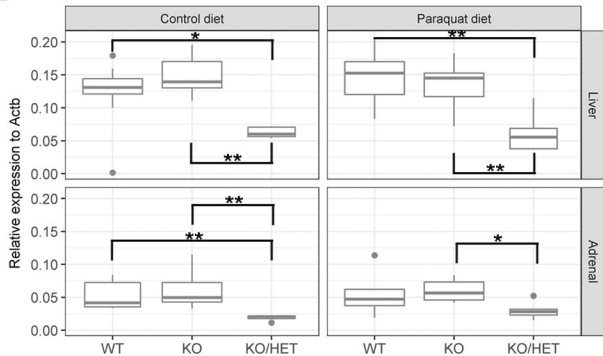

**A****TaqMan Star**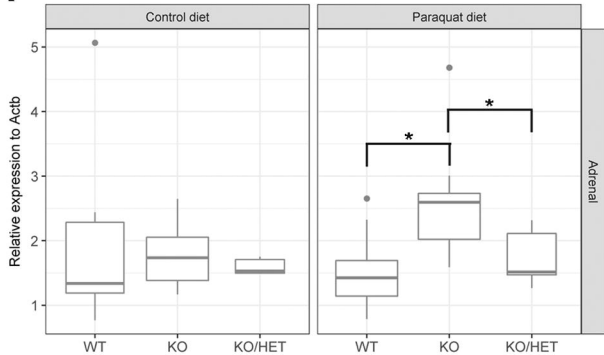**B****LC-MS/MS androstenedione (AE)**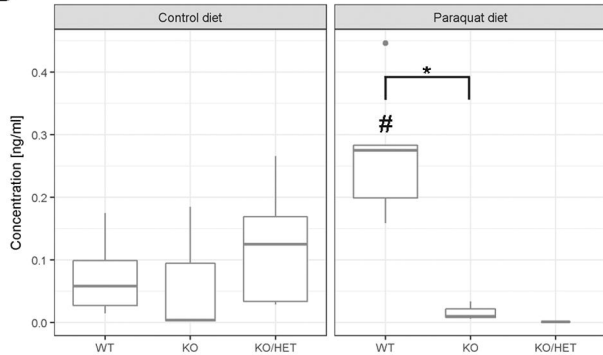

**A****Food intake**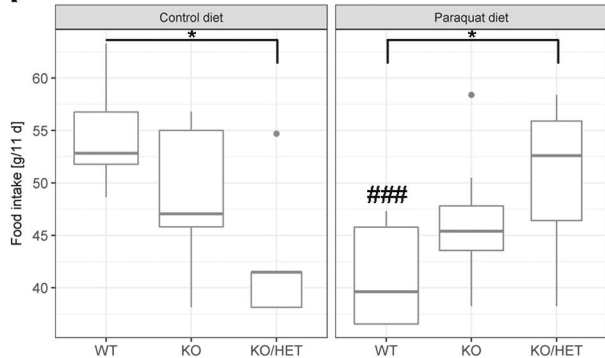**B****Weight gain**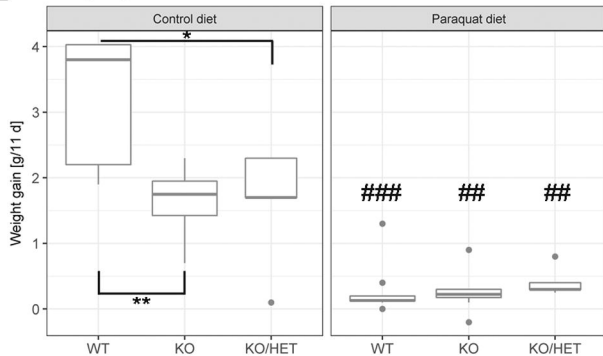

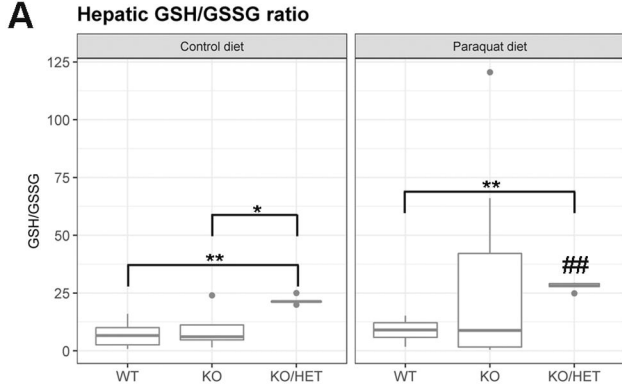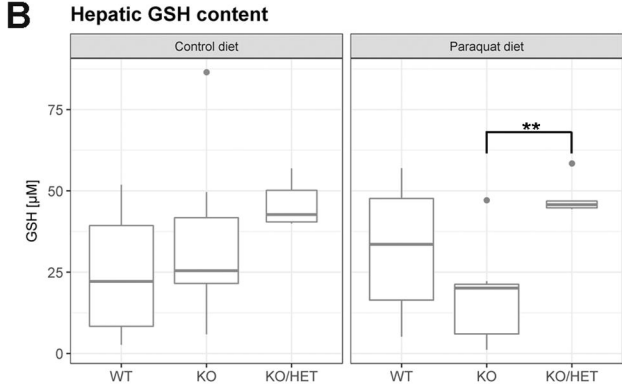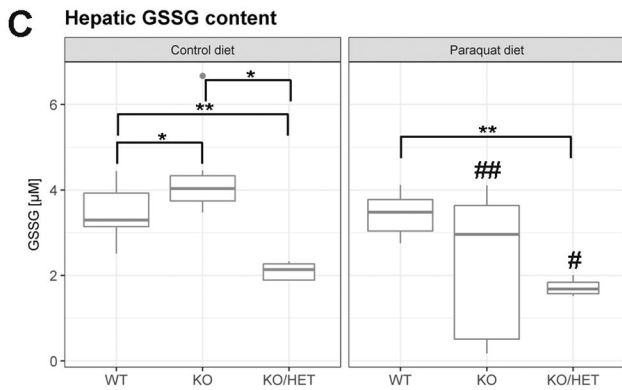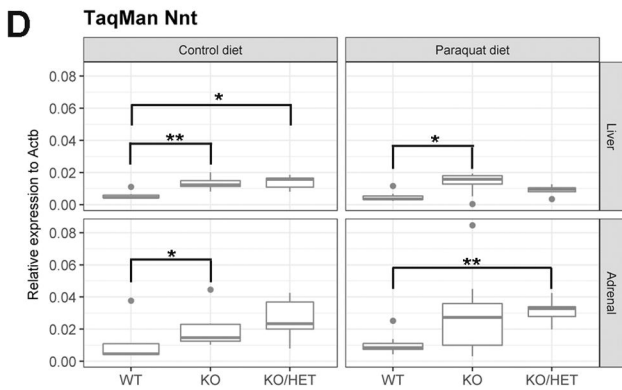

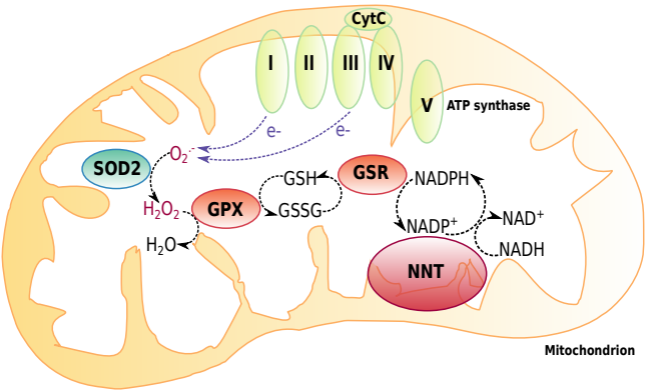

Mitochondrion
